# Supplementary material
Source: PubMed Central journal article supplement (PMC7039123)

## **Supplemental Information**

### **Parallel evolution of chemokine binding by structurally related herpesvirus decoy receptors**

Olga Y. Lubman and Daved H. Fremont

## Supplemental Figures

**Figure S1. Chemokines bind at distinct locations on R17 and M3.** (A) Ribbon diagrams of M3/CCL2 and R17/CCL3 with structurally equivalent regions outlined with dotted red ovals. The indicated mutations were introduced into R17 to test the hypothesis that chemokines bind to structurally analogous regions observed for M3. (B) SPR traces for binding of CCL2 and CCL3 chemokines to wild type R17, R17 $\Delta^{248-254}$ , and R17 $^{65AAA68}$ . No significant changes in binding affinity were noted.

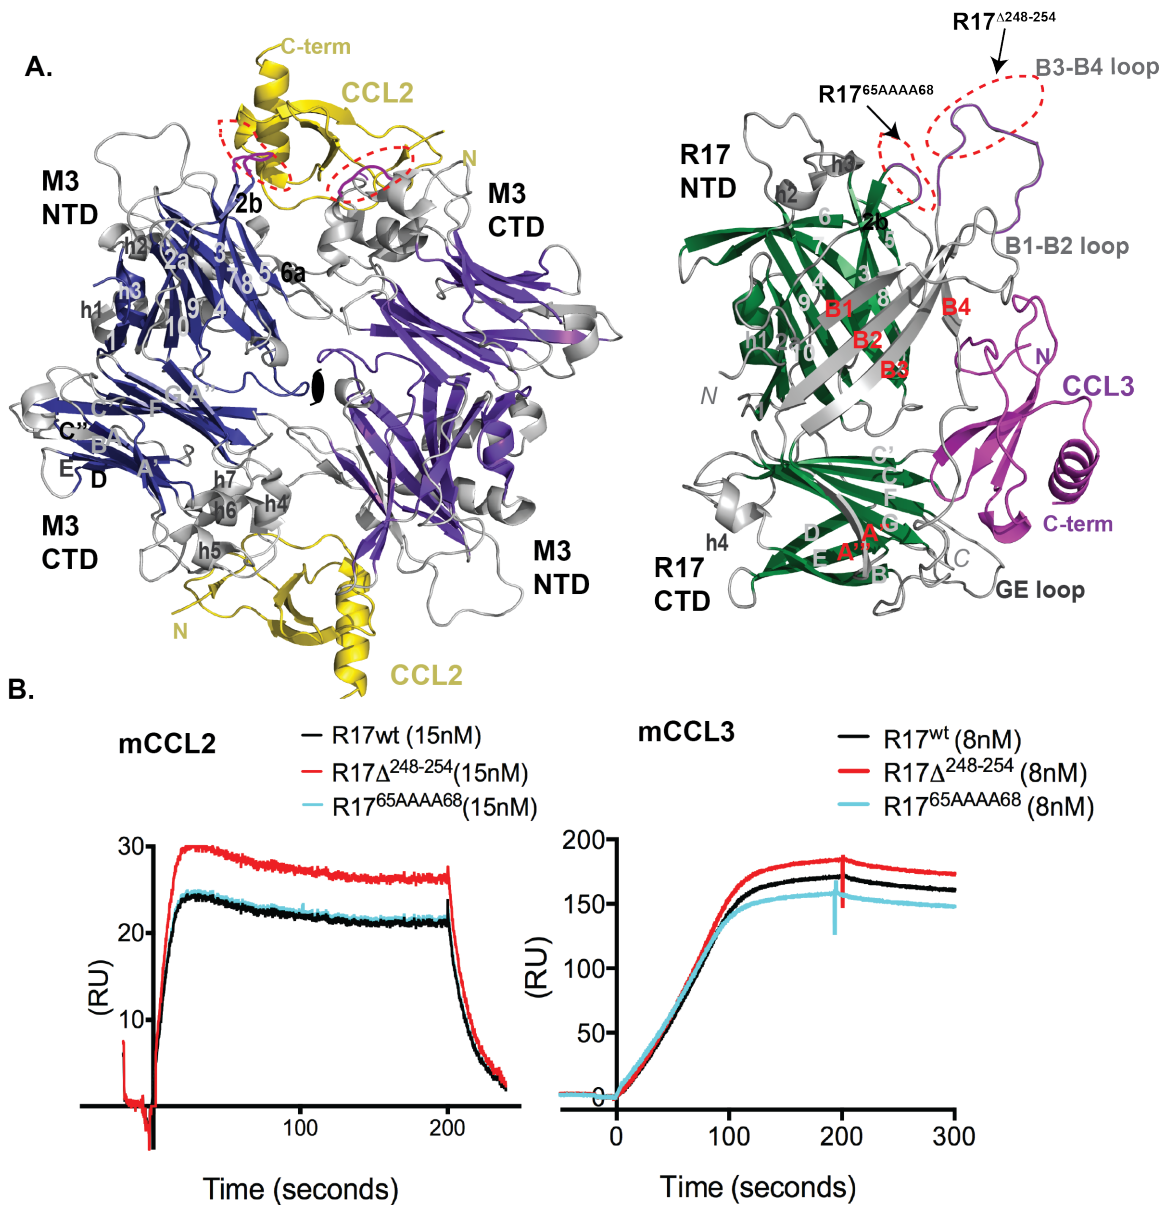

**Figure S2: MALS molecular mass assessment of R17<sup>GAG2</sup> alone and in complex with mCCL3 (D27A).** R17<sup>GAG2</sup> or R17<sup>GAG2</sup>/mCCL3(D27A) was first passed through a gel filtration column before assessment by multiple-angle light scattering, which allows for unambiguous mass determination for proteins eluting as monodisperse peaks. Calc, calculated; Exp, experimental.

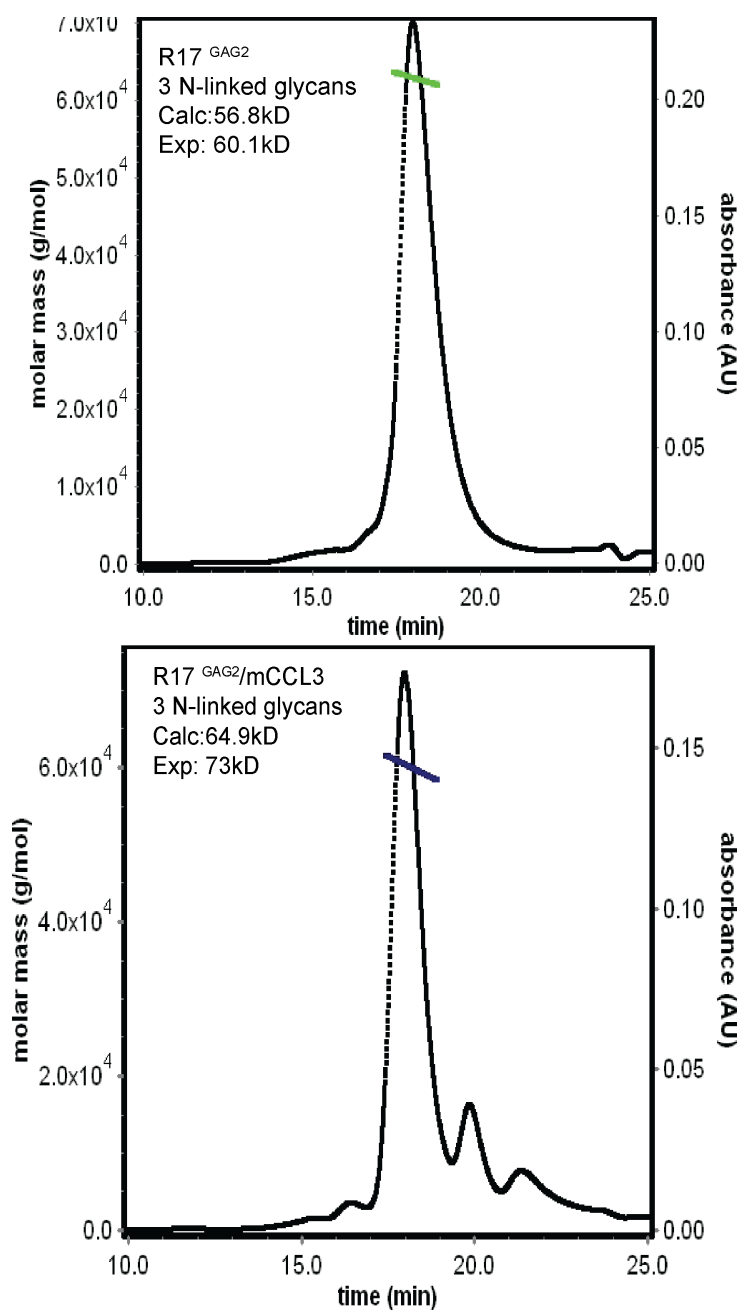

Supplement: NIHMS742058-supplement-1.pdf [file NIHMS742058-supplement-1.pdf]
